# Supplementary material
Source: Springer Nature journal article supplement (https://www.springermedizin.de/resource/supplementary/13045_2008_32_MOESM3_ESM.pdf/9660608)

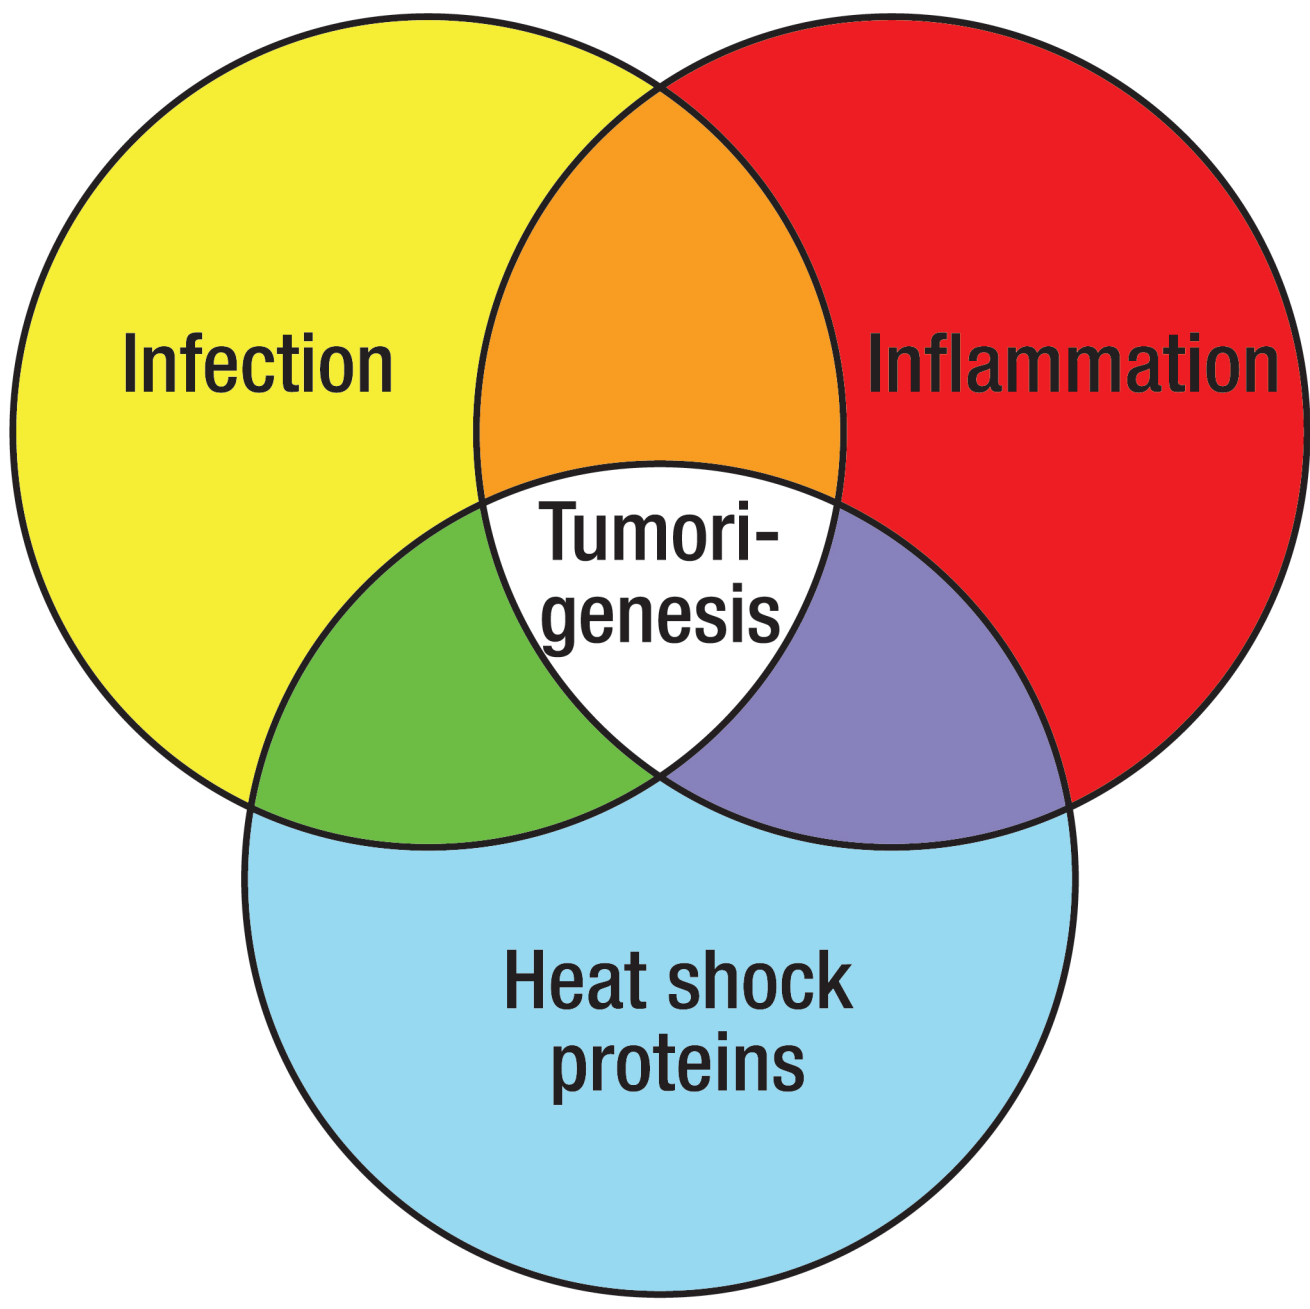

**Infection**

**Inflammation**

**Tumori-  
genesis**

**Heat shock  
proteins**

Supplement: MOESM3 [file 9660608]
